# Supplementary material
Source: Springer Nature journal article supplement (https://www.springermedizin.de/resource/supplementary/13058_2008_2088_MOESM2_ESM.pdf/9700606)

# Supplementary Results

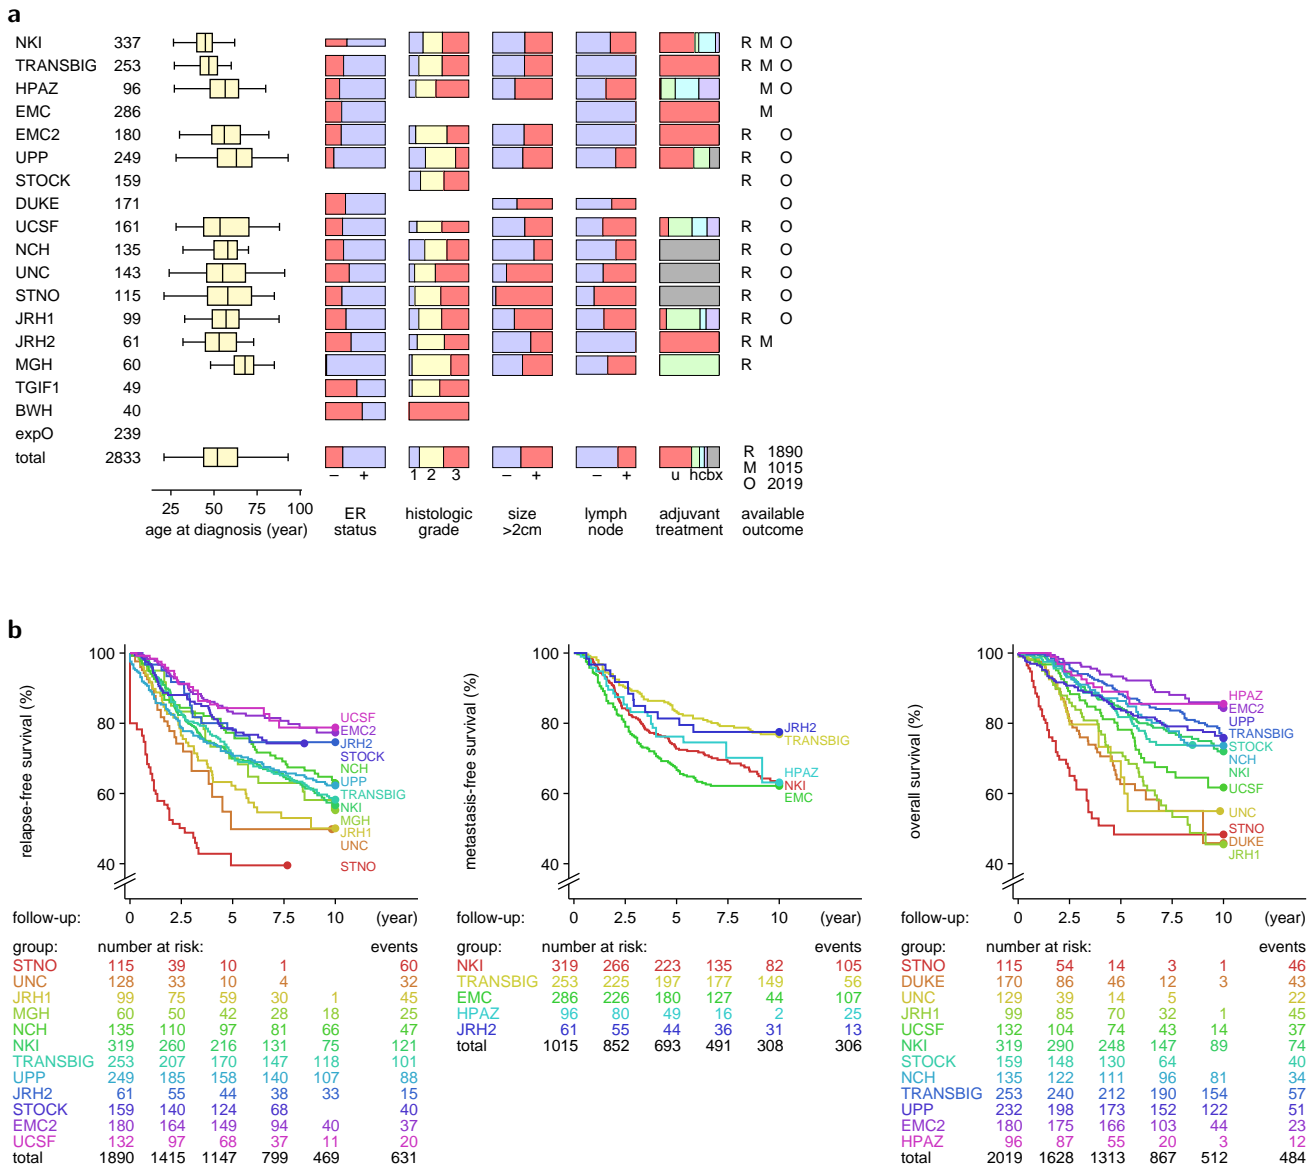

Figure 1: Summaries of patient characteristics for each dataset. a) Distribution of important clinical variables, shown by boxplots for continuous variables and by colored bars showing proportions for categorical variables. The heights of the bars correspond to proportion of non-missing values. For adjuvant treatment, u = untreated, h = hormone therapy, c = chemotherapy, b = both, x = unspecified. For 'available outcome', the reported endpoints are: R = any relapse (unspecified), M = distant metastasis and O = overall survival. The numbers of patients with available follow-up data for each type of outcome are shown on the "total" line. b) Kaplan-Meier curves showing the heterogeneity of survival when the patients were stratified by the cohorts.

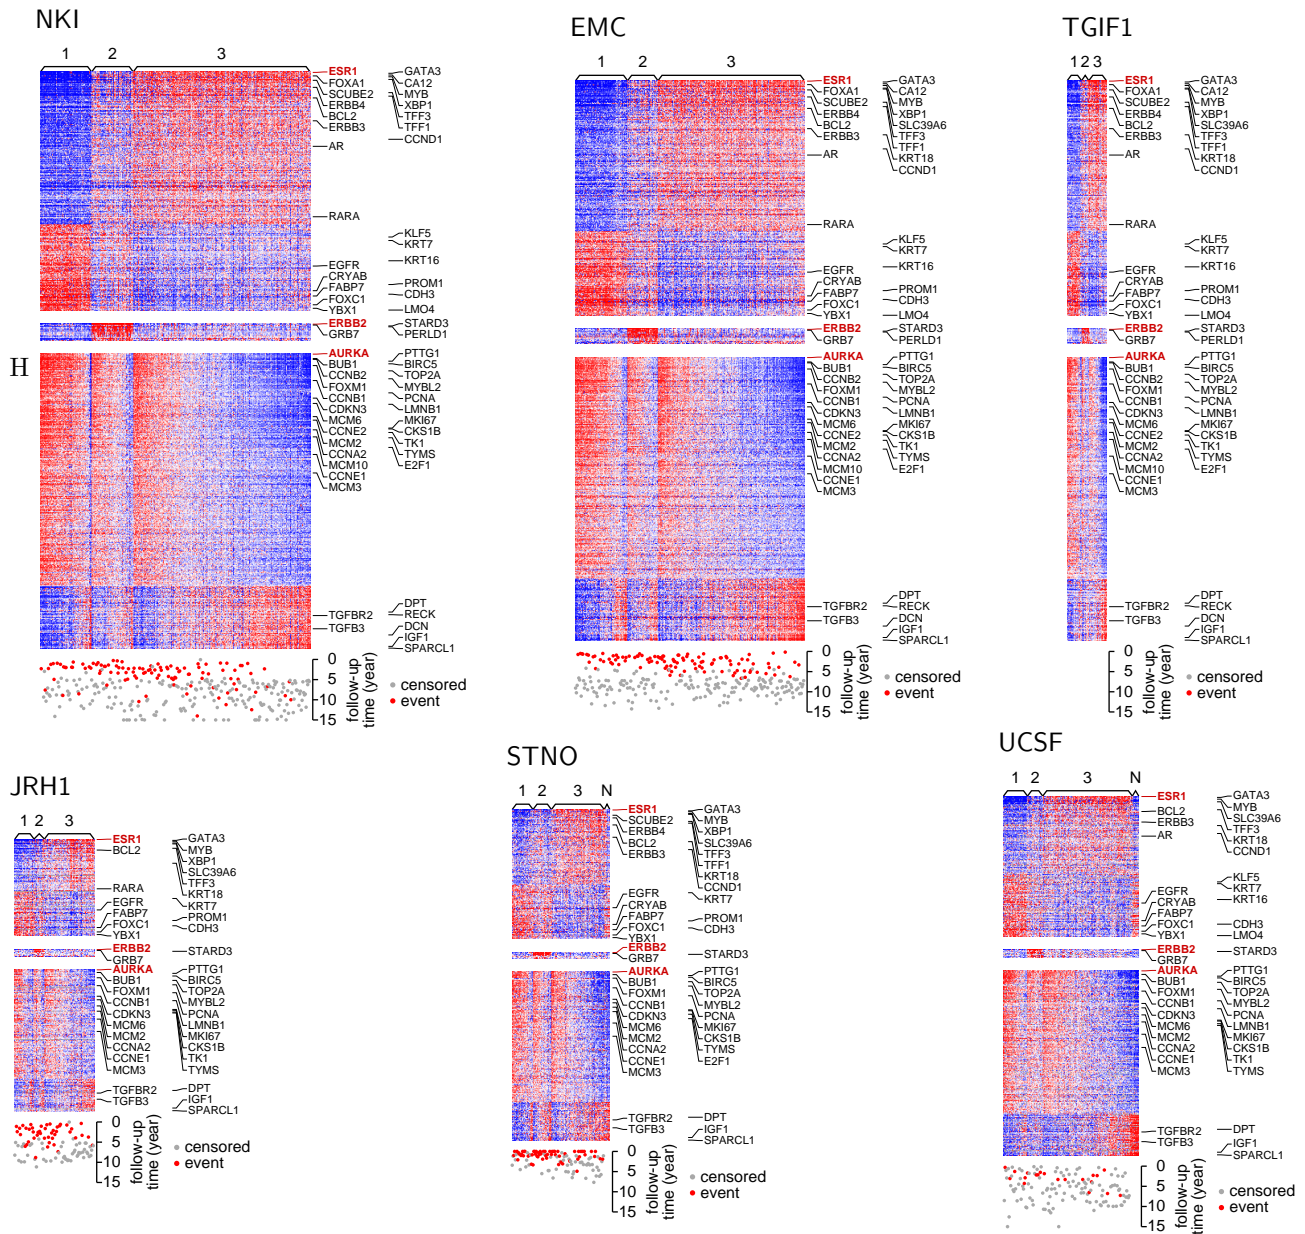

Figure 2: Heatmaps demonstrating the coexpression modules for all datasets (figures continued on the following two pages). The rows are genes, grouped according to the modules, whose gene symbol of the prototypes are shown in red. Within each group, the genes are ranked according to their  $Z$ -scores of association with their respective prototype. The columns are tumors, grouped according to subtype 1 (ER-/HER2-), 2 (HER2+), or 3 (ER+/HER2-). Within each subtype the tumors are sorted according to the average expression of the proliferation (AURKA) module. Genes within a module show strong correlated or anticorrelated expression with the prototype gene. The names of several well-known genes are shown to the right of each module. Underneath the heatmaps are patient's survival data.

### UPP

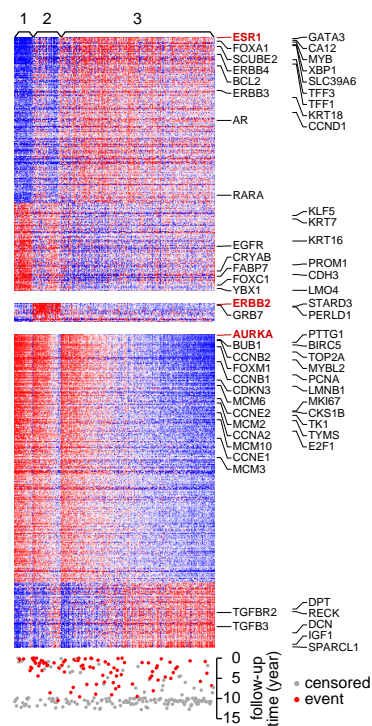

### STOCK

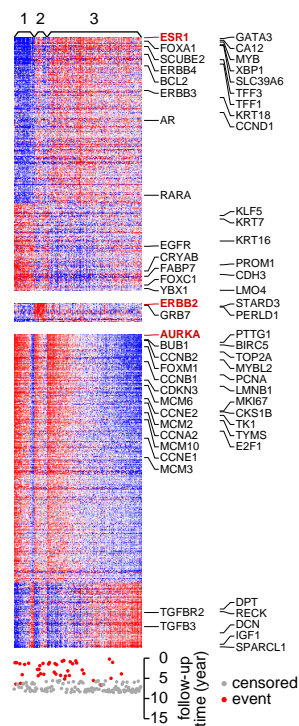

### exp0

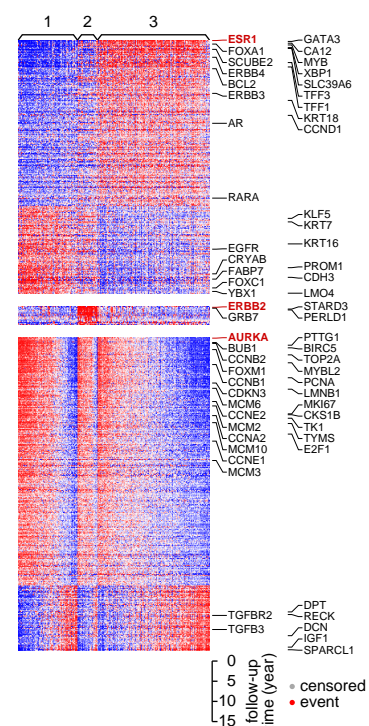

### TRANSBIG

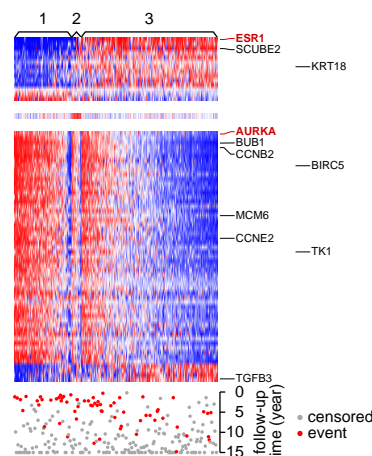

### HPAZ

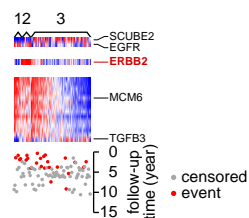

### EMC2

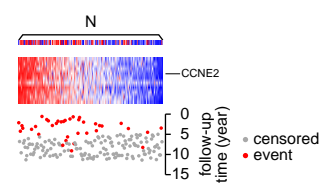

**Note** Because of the small number of genes mapped, the vertical scale of the heatmaps for TRANSBIG, HPAZ and EMC2 is larger than that of other datasets.



### UNC

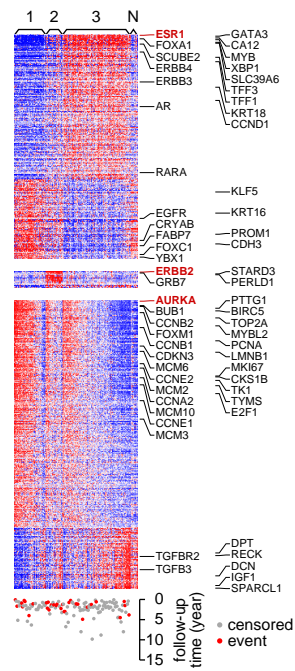

### NCH

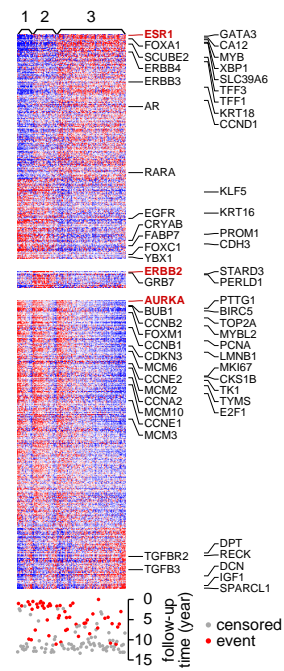

### JRH2

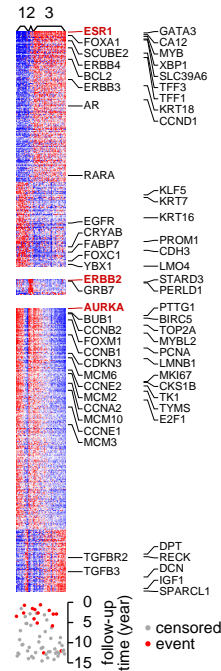

### BWH

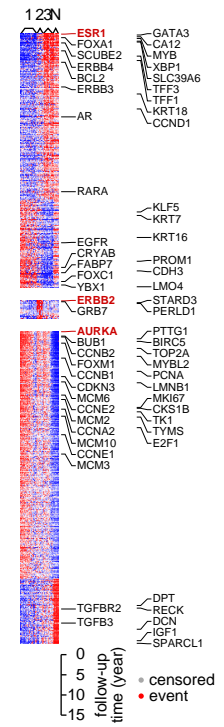

### MGH

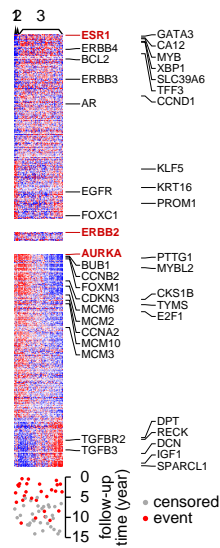

### DUKE

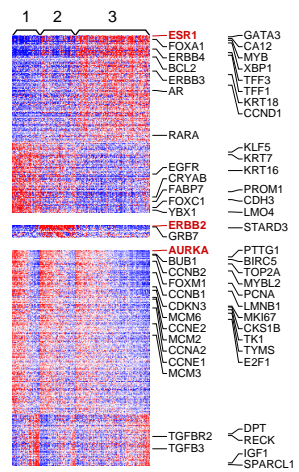

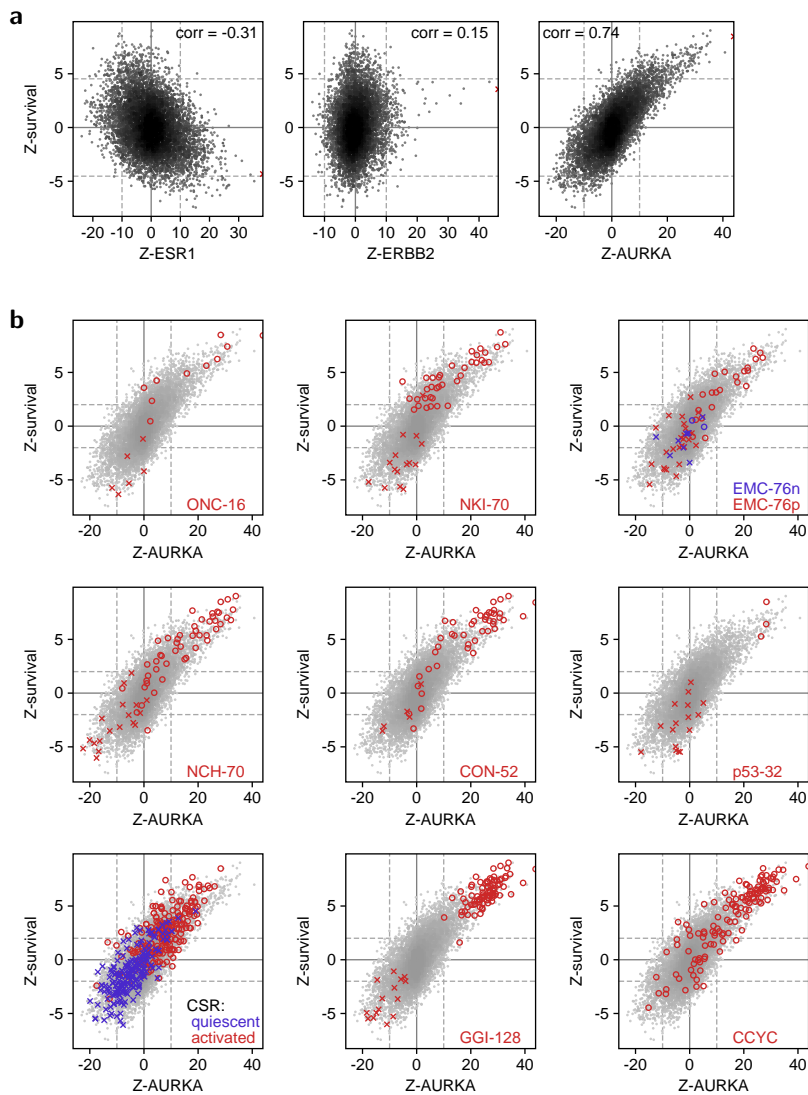

Figure 3: Prognostic power and modular association of individual genes. a) In each plot, the  $Z$ -score of survival association (vertical axis) is plotted against the  $Z$ -score of coexpression with a module prototype (horizontal axis) with their Pearson correlation coefficient indicated by "corr". The  $Z$ -survival of the prototype gene is shown by the cross on the right border. The band of  $(\pm 4.5)$  for  $Z$ -survival corresponds to Bonferroni correction for selecting from 17198 genes (at  $p = 0.05$ ). The more stringent band of  $\pm 10$  is used for the  $Z$ -scores of coexpression. Strongly prognostic genes tend to be coexpressed with AURKA. b) Genes from various signatures (see table 2 in the main text) are overlaid on the scatter plots of  $Z$ -survival versus  $Z$ -AURKA. Circles and crosses respectively indicate positive and negative effects in the original studies. For signature EMC-76, the ER-positive and ER-negative signatures are denoted as EMC-76p and EMC-76n, respectively. The band for  $Z$ -survival  $(\pm 2)$  is the single-test significance level at  $p = 0.05$  (more appropriate if the genes are already known). Many, but not all, signature genes are confirmed to be prognostic in the dataset collection.

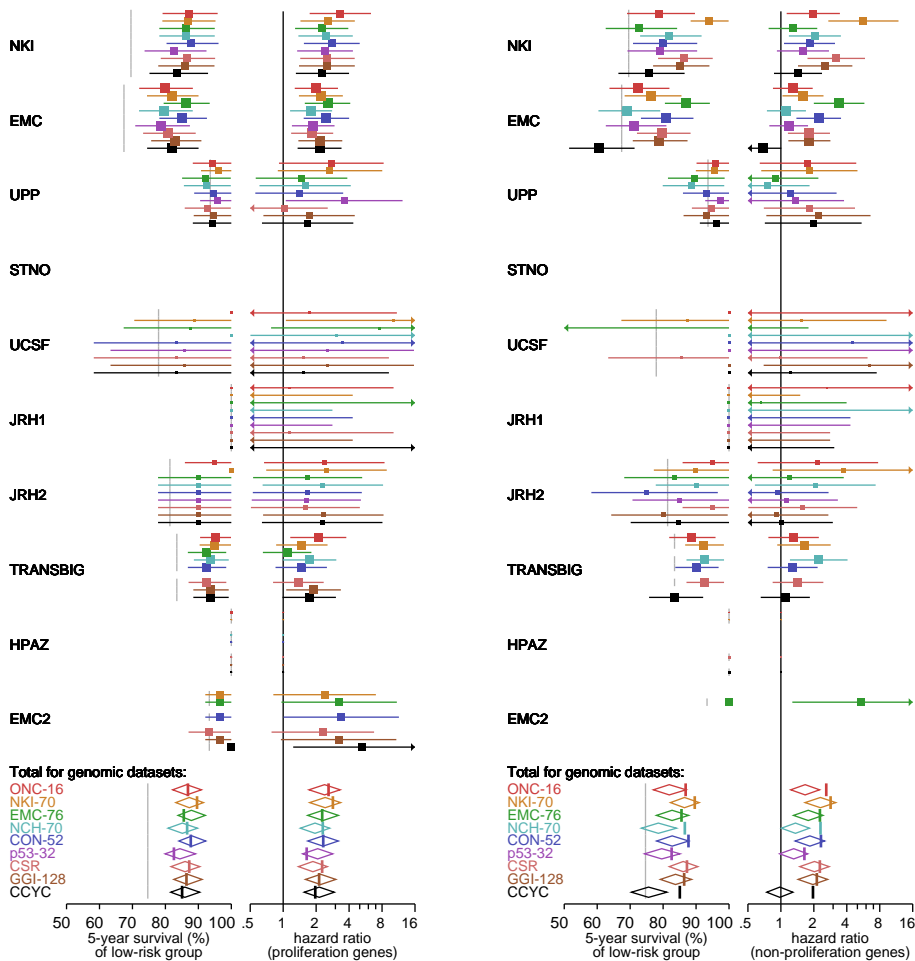

Figure 4: Detailed analysis of signature comparison. Per-dataset results corresponding to Figure 3 of the main text. The hazard ratios are stratified by datasets. Additionally, the Kaplan-Meier estimate of distant-relapse free survival at five-years for the low-risk group are shown (the estimates for high-risk group are not shown to avoid clutter). The vertical gray lines correspond to 5-year survival of the entire datasets (unstratified by risk groups). The two panels above correspond to the proliferation and non-proliferation gene subsets of untreated patients. Those for treated patients are shown on the following page. The dataset done on non-genomic platforms (TRANSBIG, HPAZ, and EMC2) were not considered when calculating the totals, due to lack of mapping for some signatures.

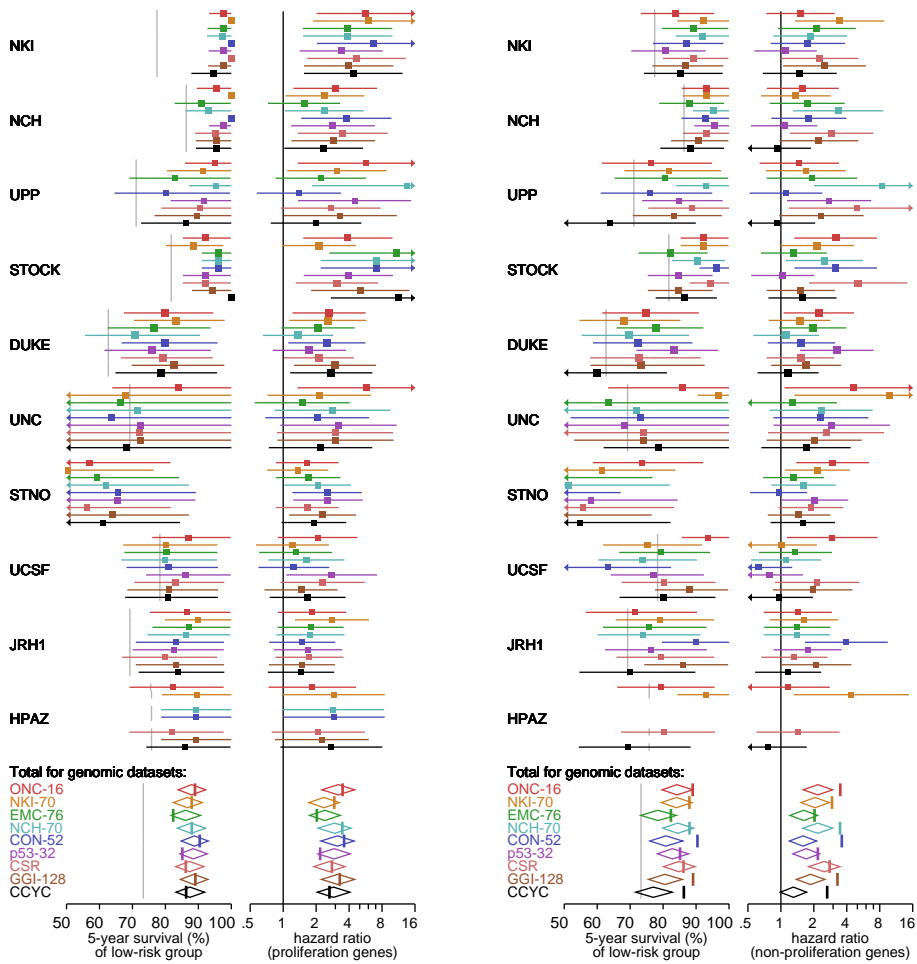

Figure 4 (continued). Results for systematically treated patients. See previous page for description.

Figure 5. Patient classifications made by different signatures (rows) when they are applied to various datasets (columns). This is the complete analysis, from which a few examples are shown in Figure 4 of the main text. The rows are signatures and the columns are datasets. All vertical axes correspond to proliferation score.

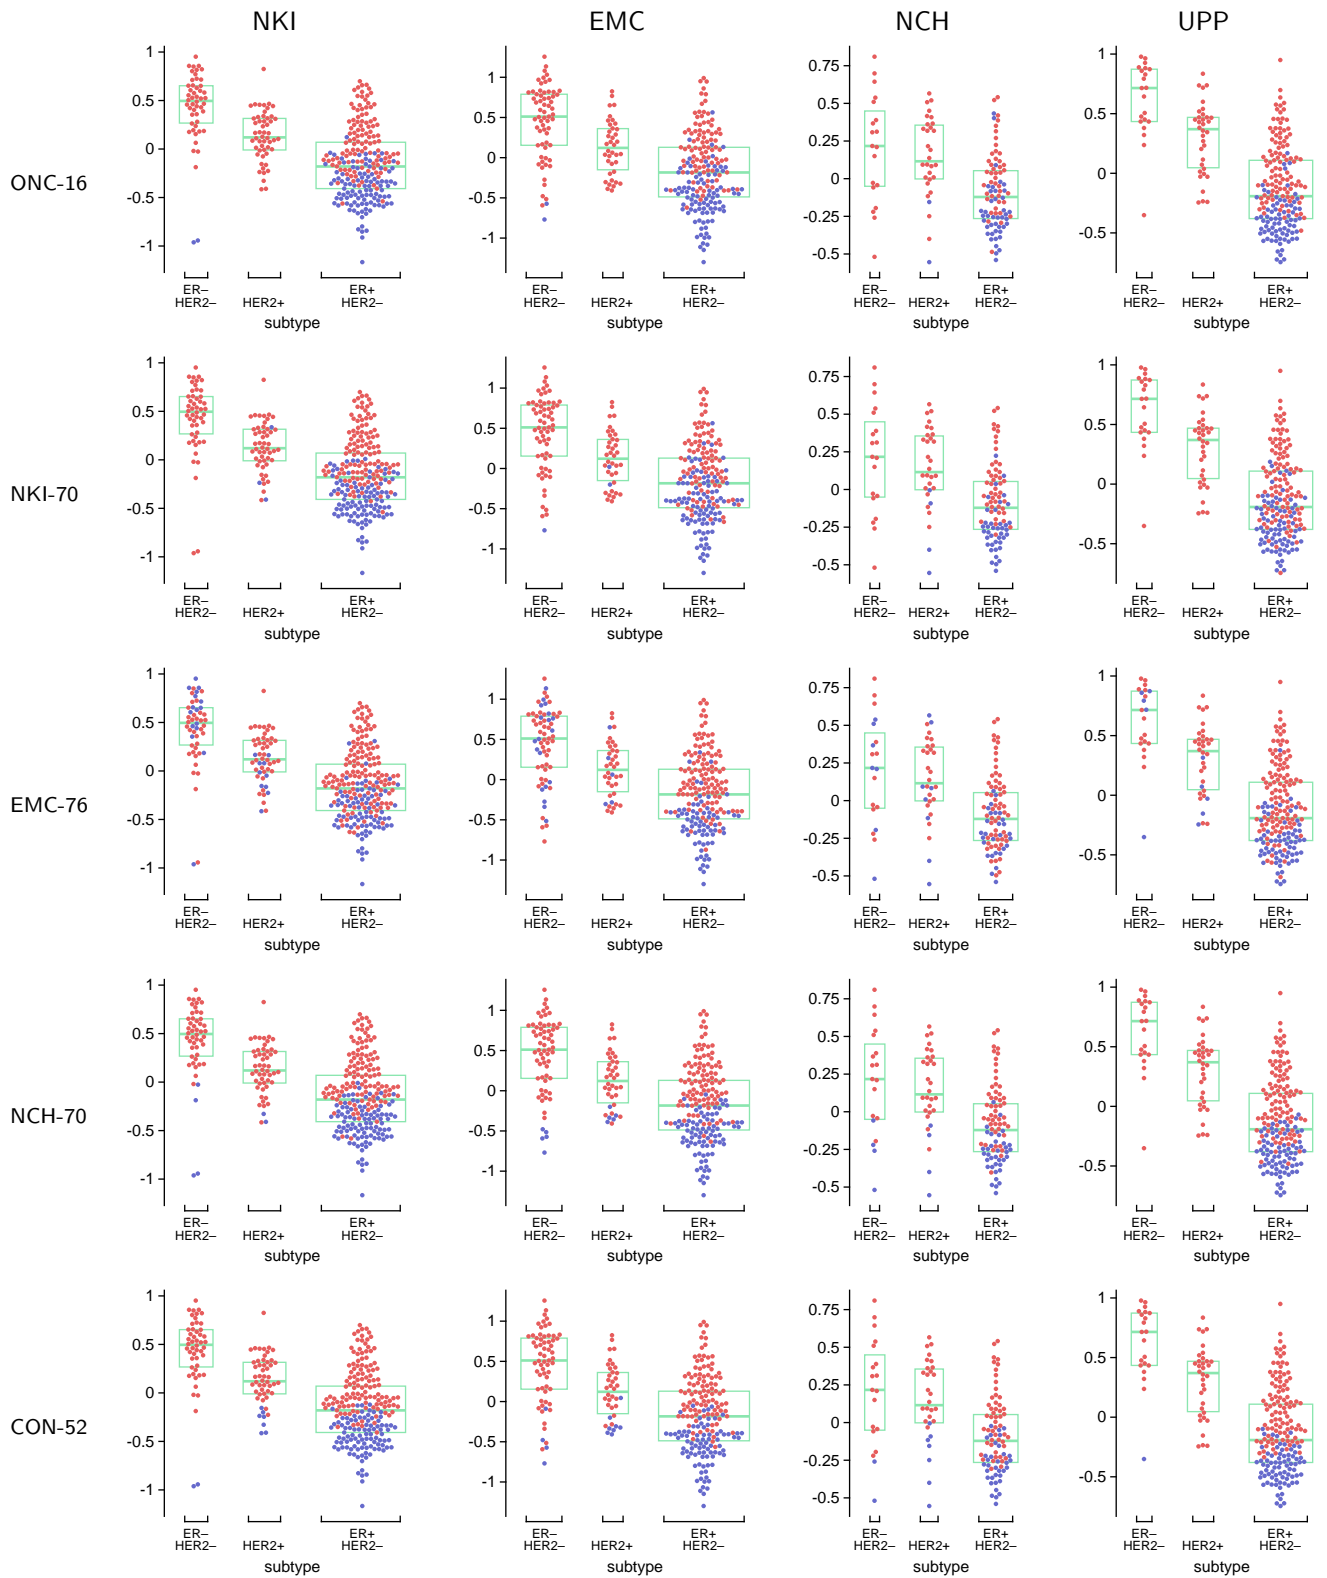



All vertical axes correspond to proliferation score.

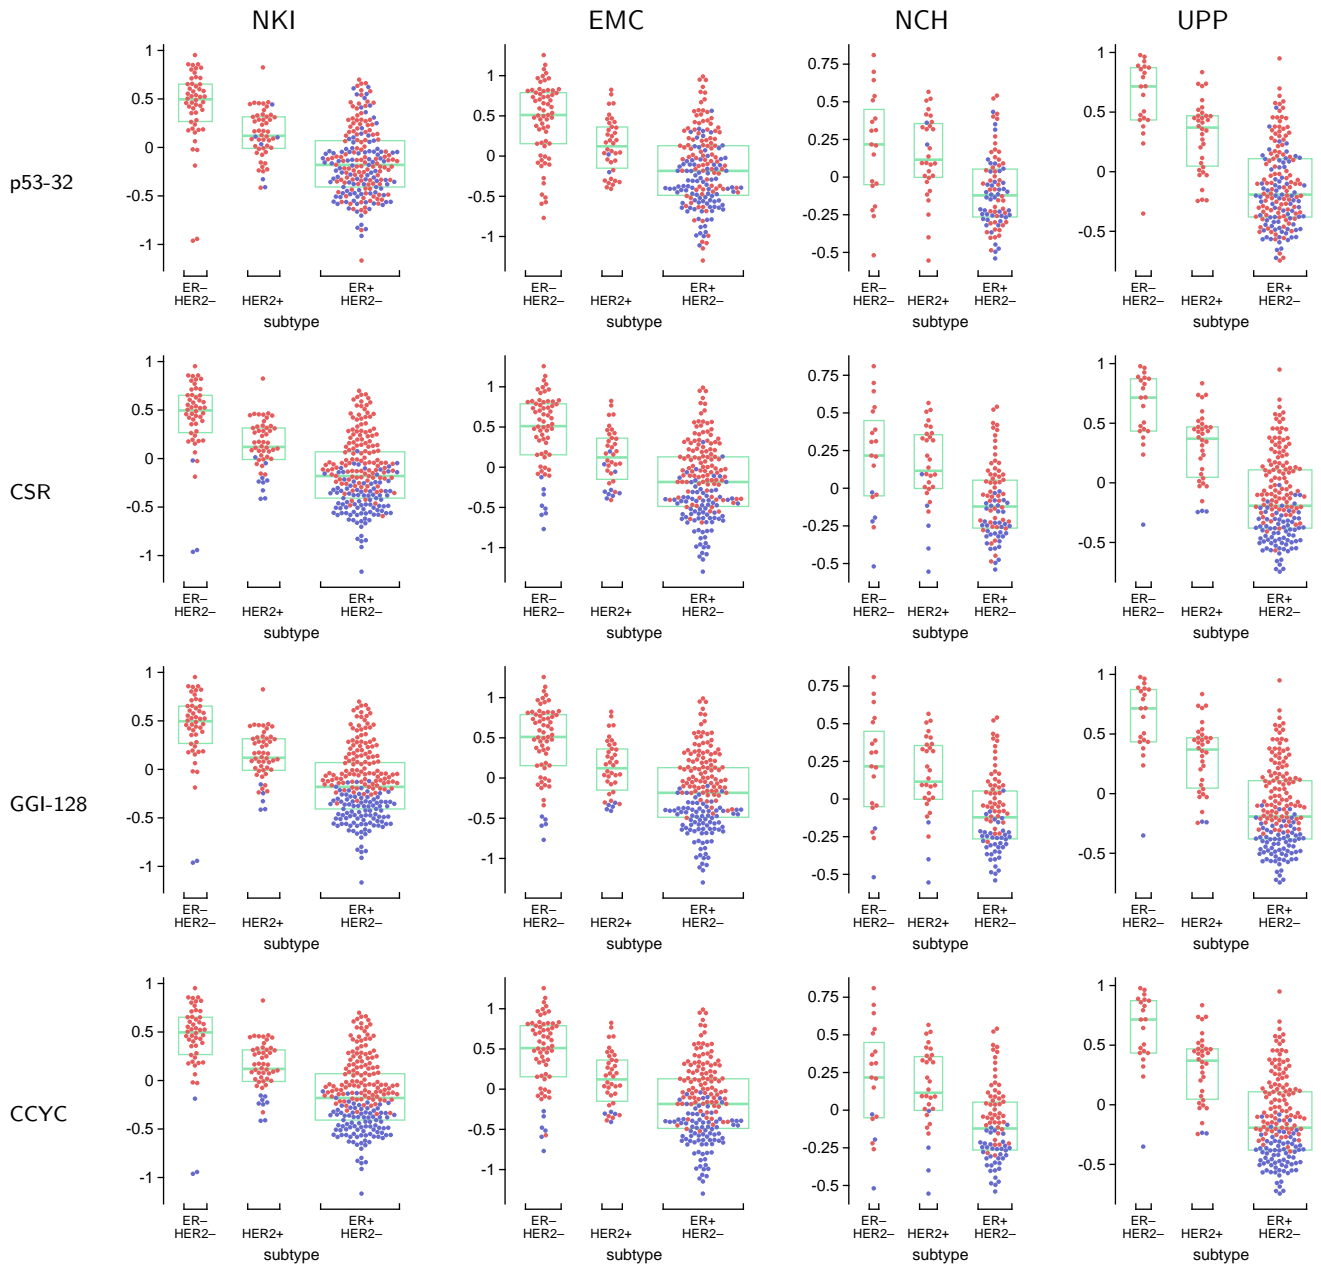

All vertical axes correspond to proliferation score.

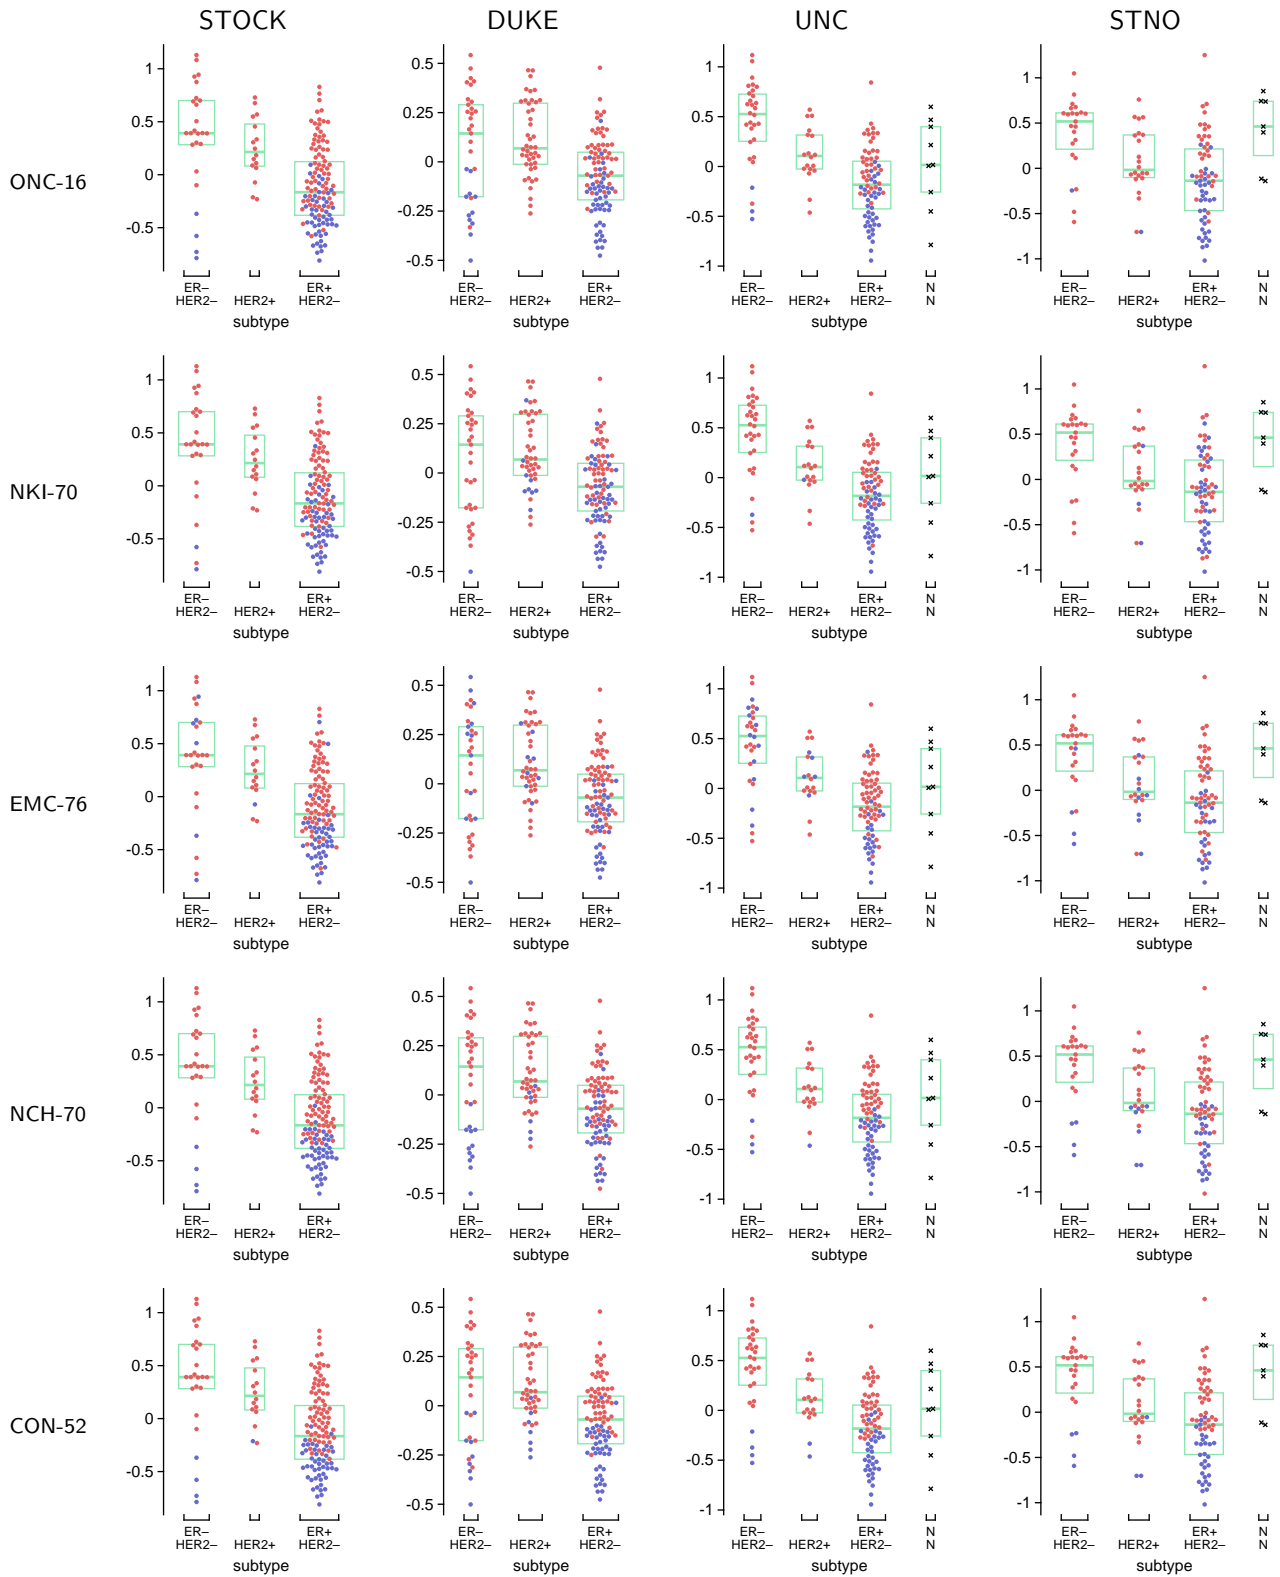

All vertical axes correspond to proliferation score.

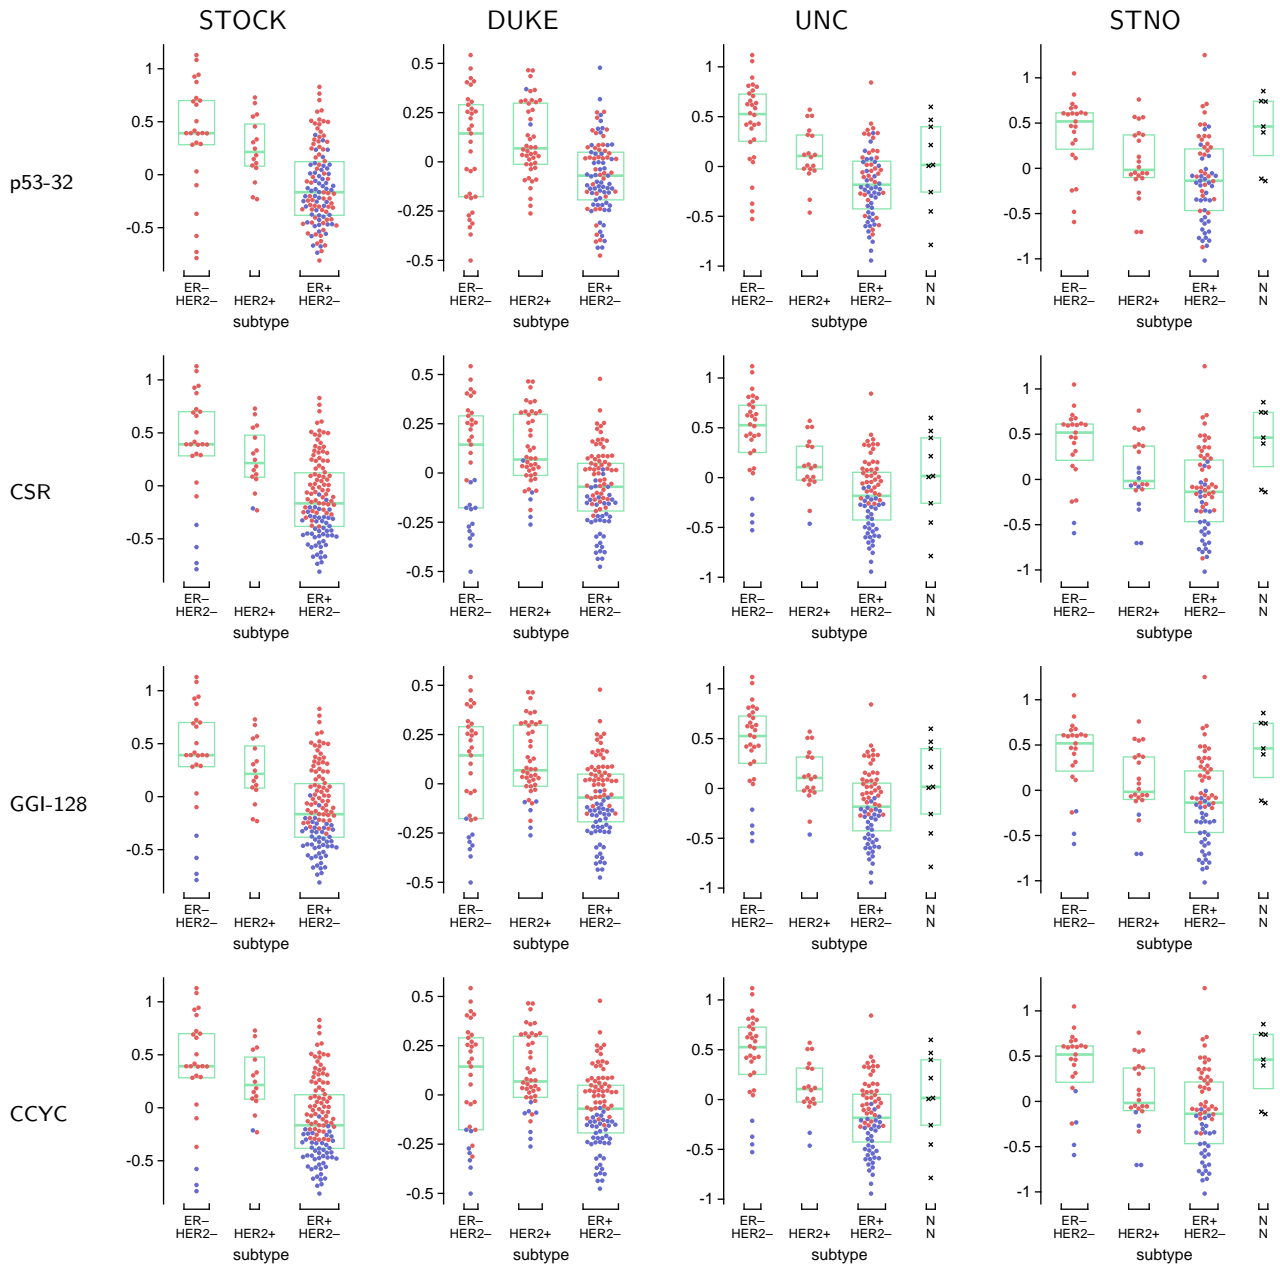

All vertical axes correspond to proliferation score.

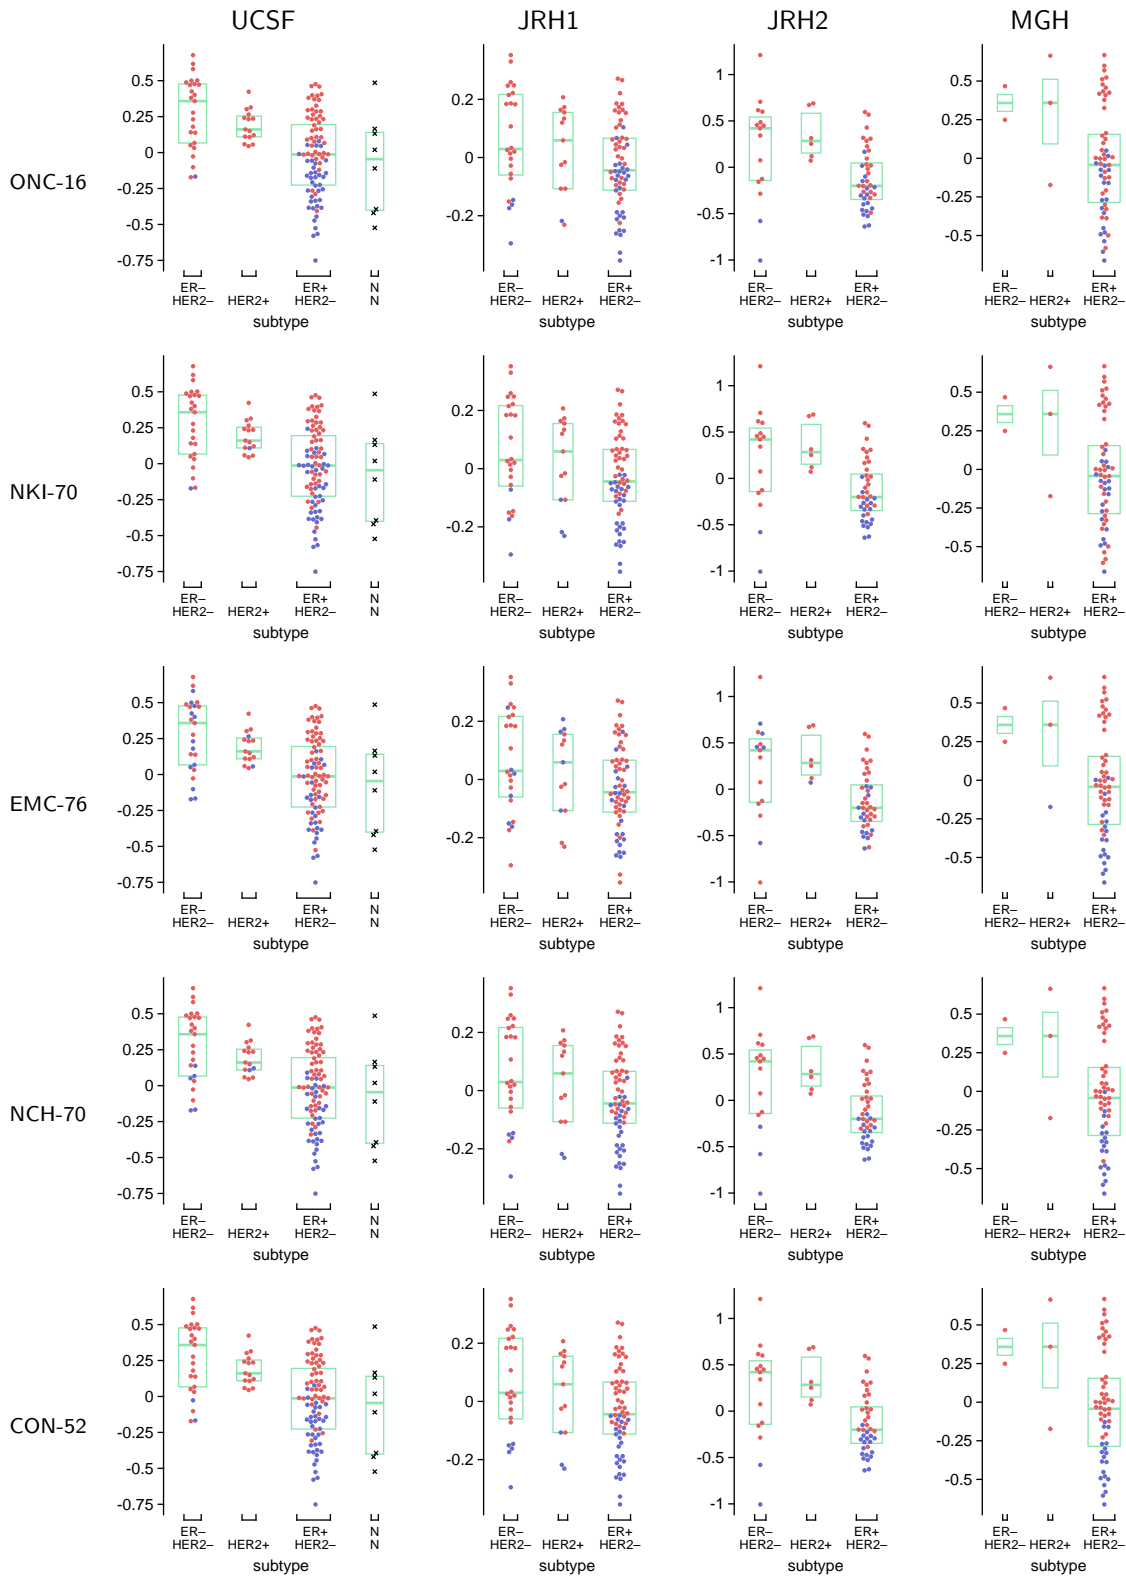

All vertical axes correspond to proliferation score.

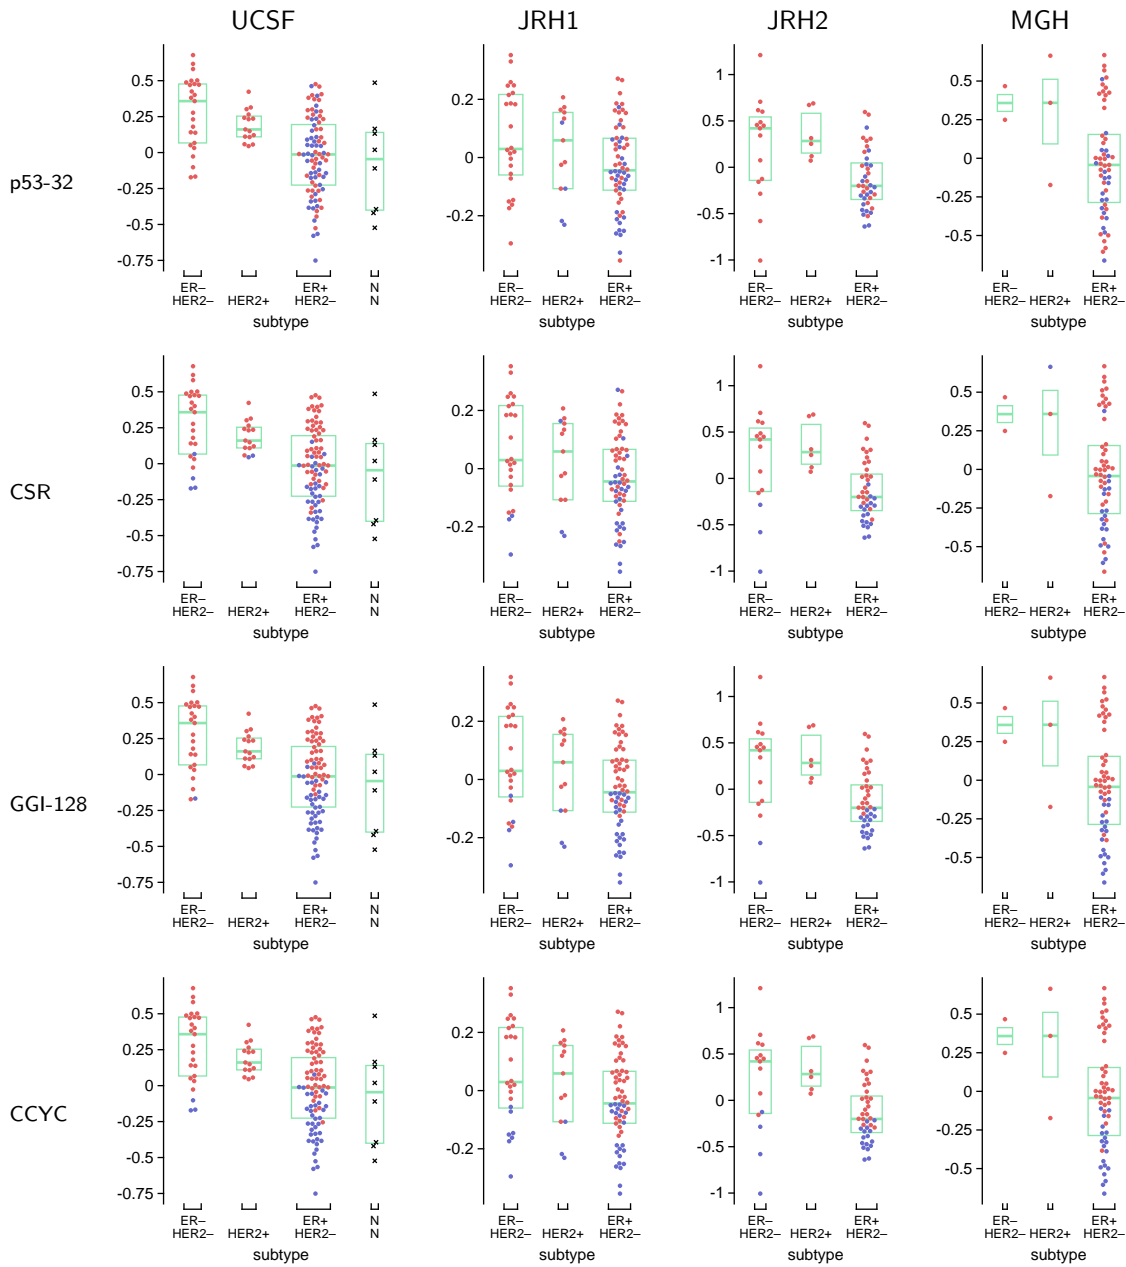



## Combined prediction by pairs of signatures

Every distinct pair of signatures were combined in the following way:

1. Their continuous prediction scores were used as explanatory variables in Cox regression (stratified by dataset).
2. The fitted coefficients were used as weights in linear combination of the two prediction scores to produce the combined prediction score
3. The combined scores were used to rank patients. 33% in each dataset were classified as low-risk.

Figure 6. The results for the 36 pairs are shown below as the black bars to the right of the individual signatures. The identity of each combination is not shown (the ordering from left to right is [ONC-16 + NKL-70], [ONC-16 + EMC-76p], and so on), because we only want to demonstrate that their hazard ratios and survivals are similar and within the confidence interval of the some individual signatures. Note that the combined performance may be slightly biased upward because the weights are estimated from the same data. Even so, the improvement is not clinically substantial.

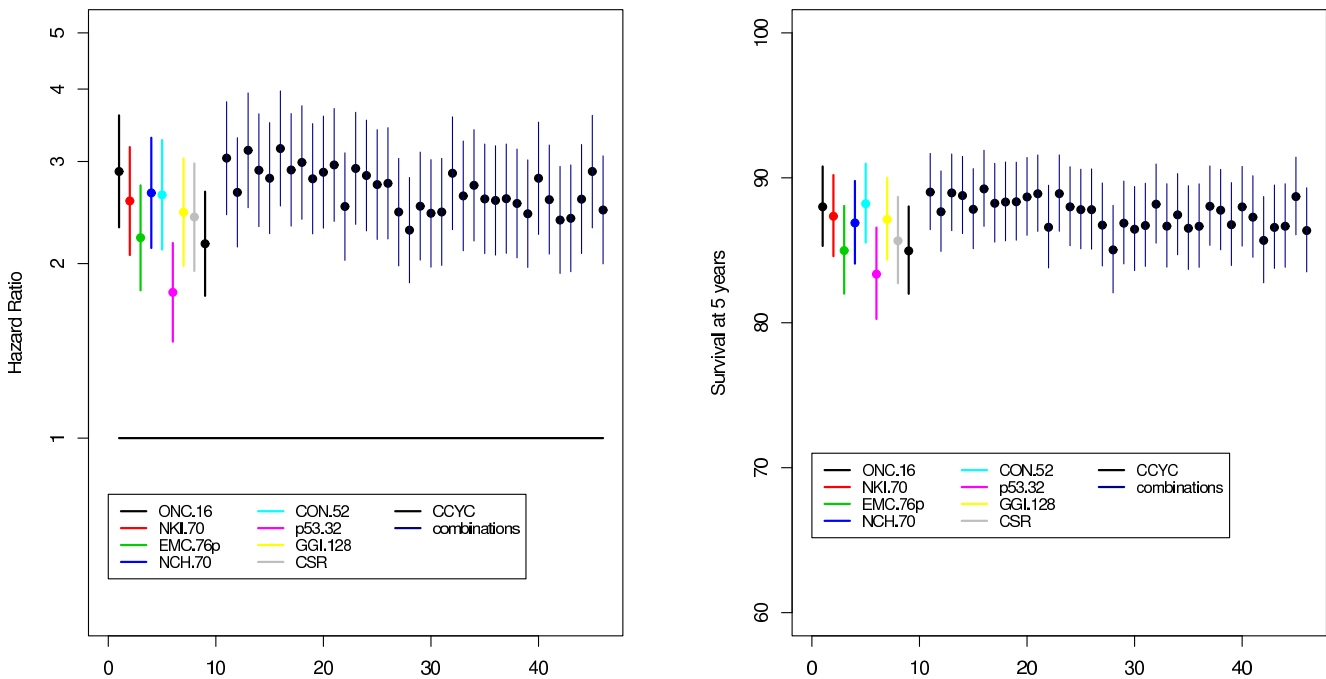

Supplement: MOESM2 [file 9700606]
